# Supplementary material for: Restructuring of poly(2-ethyl-2-oxazoline)/tannic acid multilayers into fibers
Source: Royal Society of Chemistry journal article supplement (doi:10.1039/c8sm00381e), 2018-01-01
Supplement: c8sm00381e1.pdf [file c8sm00381e1.pdf]

## Electronic Supplementary Information

### Restructuring of Poly(2-ethyl-2-oxazoline)/Tannic Acid Multilayers into Fibers

E. Beruhil Adatoz<sup>a</sup>, S. Hendessi<sup>b</sup>, C.W. Ow-Yang<sup>c,d</sup> and A. L. Demirel<sup>a,b,e,†</sup>

<sup>a</sup> *Biomedical Sciences & Engineering Program, Koç University, 34450 Sarıyer, Istanbul, Turkey.*

<sup>b</sup> *Materials Science & Engineering Program, Koç University, 34450 Sarıyer, Istanbul, Turkey.*

<sup>c</sup> *Materials Science & Nano-Engineering Program, Sabancı University, 34956 Tuzla, Istanbul, Turkey.*

<sup>d</sup> *Nanotechnology Research and Application Center, Sabancı University, 34956 Tuzla, Istanbul, Turkey.*

<sup>e</sup> *Chemistry Department, Koç University, 34450 Sarıyer, Istanbul, Turkey.*

<sup>†</sup> *Corresponding author: [ldemirel@ku.edu.tr](mailto:ldemirel@ku.edu.tr).*

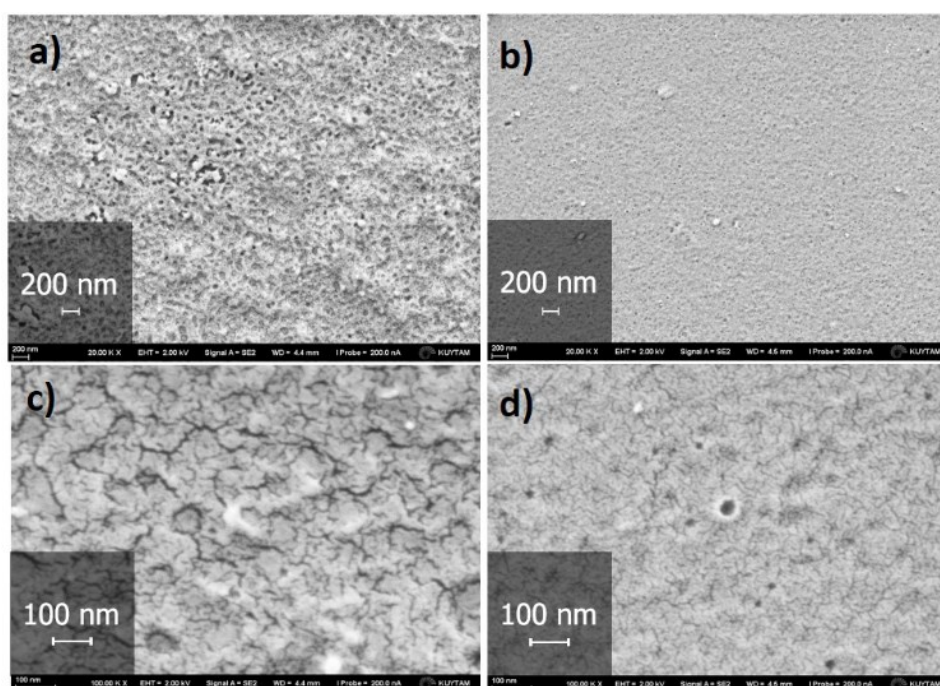

**Figure S1.** a), c) SEM images of 30 BL PEOX/TA film prepared in the presence of  $\text{H}_2\text{PO}_4^-$  anions; b), d) SEM images of 30 BL PEOX/TA film prepared in the absence of  $\text{H}_2\text{PO}_4^-$  anions.

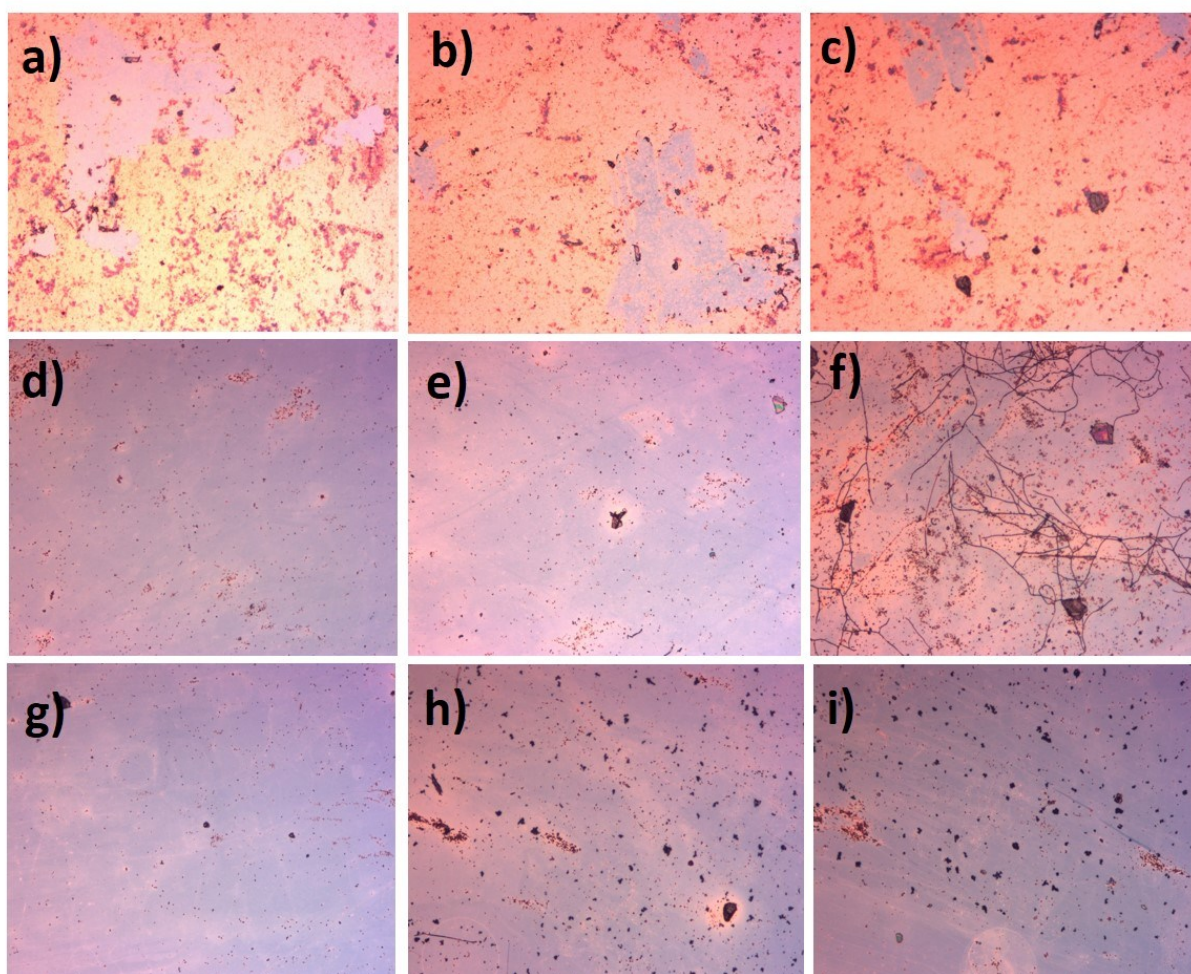

**Figure S2.** Optical microscopy images of 30 BL PEOX/TA films grown and kept at various conditions: a-c) 30 BL PEOX/TA film prepared at pH3 phosphate buffer and observed at pH3 in the absence of  $\text{H}_2\text{PO}_4^-$  anions: a) after preparation, b) after 1 day at pH3, c) after 2 days at pH3; d-f) 30 BL PEOX/TA film prepared at pH3 in the absence of  $\text{H}_2\text{PO}_4^-$  anions and observed at pH3 in the presence of  $\text{H}_2\text{PO}_4^-$  anions: d) after preparation, e) after 1 day at pH3, f) after 2 days at pH3; g-i) 30 BL PEOX/TA film prepared at pH3 in the absence of  $\text{H}_2\text{PO}_4^-$  anions and observed at pH3 in the absence of  $\text{H}_2\text{PO}_4^-$  anions: g) after preparation, h) after 1 day at pH3, i) after 2 days at pH3. All images are 2.74 mm x 2.05 mm.

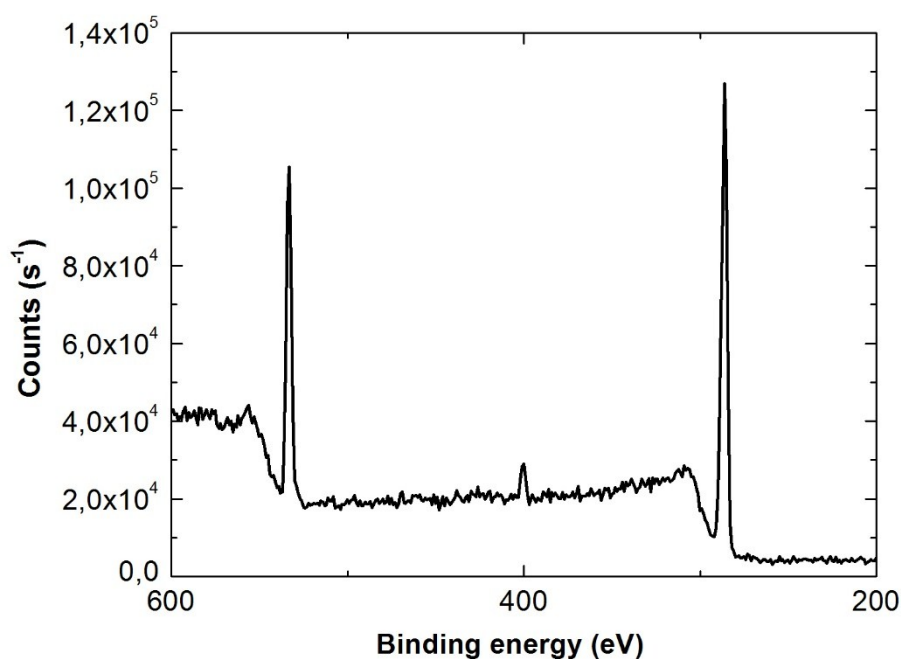

**Figure S3.** XPS spectrum of dried PEOX/TA fibers. The peaks correspond to C 1s at 286 eV, O 1s at 533 eV and N 1s at 400 eV.

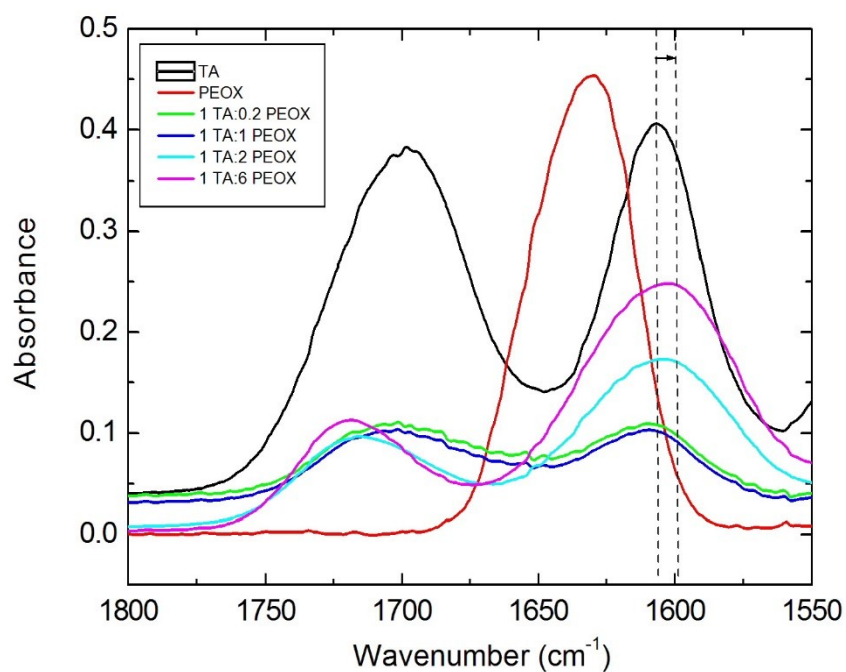

**Figure S4.** FTIR spectrum of PEOX/TA complexes with changing PEOX monomer ratio at a fixed concentration of TA showing the shifts in carbonyl (C=O) group of both PEOX and TA. The arrow indicates the shift in TA peak due to H-bonds with PEOX.



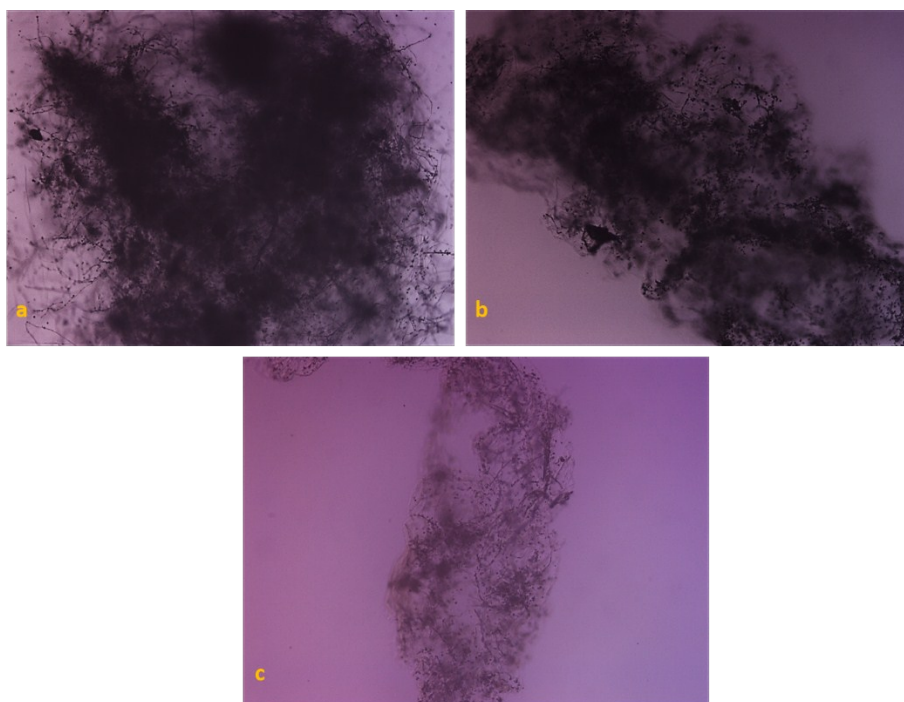

**Figure S5.** a) Optical microscope image of PEOX/TA fibers in pH3 phosphate buffer solution before transferring into pH10 solution (5480  $\mu\text{m}$  x 4110  $\mu\text{m}$ ) b) Optical microscope image of PEOX/TA fibers in pH10 aqueous solution after several hours (5480  $\mu\text{m}$  x 4110  $\mu\text{m}$ ) c) Optical microscope image of PEOX/TA fibers in pH10 aqueous solution after 24 hours (5480  $\mu\text{m}$  x 4110  $\mu\text{m}$ ).

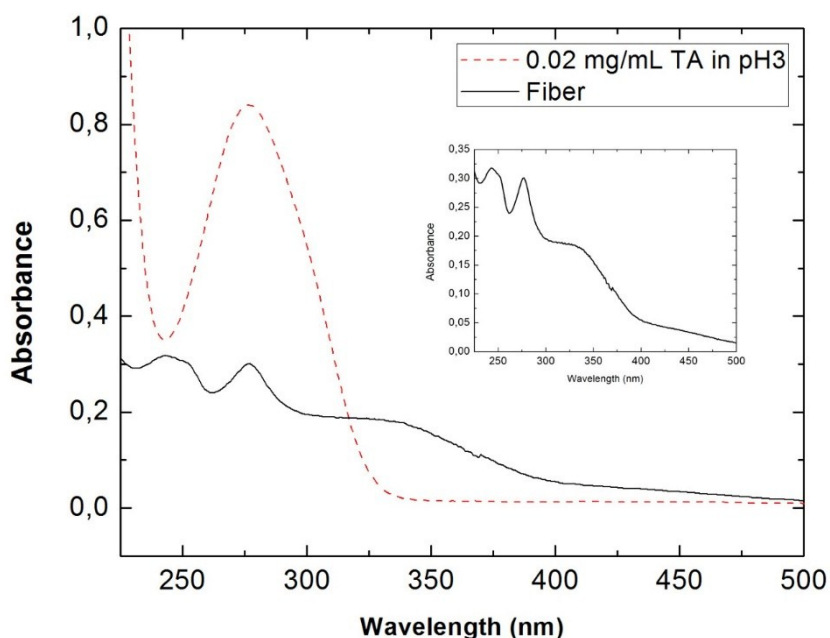

**Figure S6.** UV-Visible spectrum of dissolved PEOX/TA fibers at pH 10 (solid line) indicating the presence of ionized TA (The inset is the magnified spectrum). The dashed line is the UV-Visible spectrum of TA at pH3 (non-ionized) showing a single peak at 276 nm.
